# Supplementary material for: scRNASeqDB: A Database for RNA-Seq Based Gene Expression Profiles in Human Single Cells
Source: MDPI journal article supplement (doi:10.3390/genes8120368), 2017-12-05
Supplement: s1 [file s1]

## Supplementary Tables

Table S1. Summary of the search results in the PubMed database by different search strategies (by July 1<sup>st</sup>, 2016)

| Search Number | Search phrase                                                      | # papers |
|---------------|--------------------------------------------------------------------|----------|
| #1            | (single cell[Title/Abstract]) AND (transcriptome[Title/Abstract] ) | 293      |
| #2            | (single cell[Title/Abstract]) AND (RNA-seq[Title/Abstract] )       | 234      |
| #3            | scRNA-seq                                                          | 11       |
| #4            | scRNA seq                                                          | 26       |
| #5            | single-cell rna-seq                                                | 191      |
| #6            | single-cell transcriptomics                                        | 129      |
| #7            | single-cell rna-sequencing                                         | 497      |
| #8            | #1 U #2 U #3 U #4 U #5 U #6 U #7*                                  | 653      |
| #9            | Keep human rna-seq GEO data sets based on #8                       | 36       |

\* U indicates the union between two sets.

Table S2 Summary of datasets in scRNASeqDB

| Dataset ID | Title                                                                                       | PMID     | Year | Cell group [cell number]                                                                                                                                                                                                                                                                                                         | Platform                                     |
|------------|---------------------------------------------------------------------------------------------|----------|------|----------------------------------------------------------------------------------------------------------------------------------------------------------------------------------------------------------------------------------------------------------------------------------------------------------------------------------|----------------------------------------------|
| GSE36552   | Tracing pluripotency of human early embryos and embryonic stem cells by single cell RNA-seq | 23934149 | 2013 | human embryonic stem cell [peri-implantation stem cells][34]<br>human preimplantation blastomere (2-cell) [early blastomere][6]<br>human preimplantation blastomere (Oocyte) [early blastomere][3]<br>human preimplantation blastomere (zygote) [early blastomere][3]<br>human preimplantation blastomere [early blastomere][78] | GPL11154                                     |
| GSE38495   | Full-length mRNA-Seq from single-cell levels of RNA and individual circulating tumor cells  | 22820318 | 2012 | Embryonic stem cell[8]<br>LNCaP cell[6]<br>NG2-sorted cell from blood[6]<br>PC3 cell[4]<br>Primary melanocyte[2]<br>SKMEL5 cell[4]<br>T24 cell[4]<br>UACC257 cell[3]                                                                                                                                                             | GPL10999<br>GPL11002<br>GPL13112<br>GPL15520 |

|          |                                                                                          |          |      |                                                                                                                                                                                                                                                                                      |                                              |
|----------|------------------------------------------------------------------------------------------|----------|------|--------------------------------------------------------------------------------------------------------------------------------------------------------------------------------------------------------------------------------------------------------------------------------------|----------------------------------------------|
| GSE44183 | Genetic Programs in Human and Mouse Early Embryos Revealed by Single-Cell RNA-Sequencing | 23892778 | 2013 | 2-cell blastomere[3]<br>4-cell blastomere[4]<br>8-cell blastomere[10]<br>morula[3]<br>oocyte[3]<br>pronucleus[3]<br>zygote[2]                                                                                                                                                        | GPL11154<br>GPL13112                         |
| GSE44618 | Single Cell RNA-Seq                                                                      | 24299736 | 2013 | GM12878[28]                                                                                                                                                                                                                                                                          | GPL11154                                     |
| GSE49321 | Improved Smart-Seq for sensitive full-length transcriptome profiling in single cells     | 24056875 | 2013 | DG-75[7]<br>HEK293T[39]                                                                                                                                                                                                                                                              | GPL11154<br>GPL13112                         |
| GSE51254 | Quantitative assessment of single-cell RNA sequencing methods                            | 24141493 | 2013 | colon carcinoma HCT116[109]                                                                                                                                                                                                                                                          | GPL11154                                     |
| GSE52529 | Pseudo-temporal ordering of individual cells reveals regulators of differentiation       | 24658644 | 2014 | Human Skeletal Muscle Myoblasts (HSMM)[372]                                                                                                                                                                                                                                          | GPL11154<br>GPL16791                         |
| GSE53386 | Single-cell RNA-Seq transcriptome analysis of circular RNAs in mouse embryos             | NA       | 2015 | HEK293T[10]                                                                                                                                                                                                                                                                          | GPL11154<br>GPL13112<br>GPL16791<br>GPL17021 |
| GSE57872 | Single cell RNA-seq of primary human glioblastomas                                       | 24925914 | 2014 | glioblastoma [Cla][45]<br>glioblastoma [Cla+Mes][6]<br>glioblastoma [Mes][101]<br>glioblastoma [Neu][24]<br>glioblastoma [Neu+Cla][2]<br>glioblastoma [Neu+Mes][19]<br>glioblastoma [None][120]<br>glioblastoma [Pro][88]<br>glioblastoma [Pro+Cla][20]<br>glioblastoma [Pro+Neu][5] | GPL16791                                     |

|          |                                                                                      |          |      |                                     |                                  |
|----------|--------------------------------------------------------------------------------------|----------|------|-------------------------------------|----------------------------------|
| GSE58652 | Tn5 transposase and tagmentation procedures for massively scaled sequencing projects | 25079858 | 2014 | HEK293T[42]                         | GPL11154<br>GPL13112<br>GPL15228 |
| GSE60407 | Human Pancreatic CTCs Express the ECM Protein SPARC                                  | 25242334 | 2014 | circulating pancreas tumor cell[7]  | GPL16288                         |
| GSE62952 | Integrated genome and transcriptome sequencing from the same cell                    | 25599178 | 2014 | Breast Cancer cell line (SKBR3)[21] | GPL16791<br>GPL17021             |

|          |                                                                                                                                                             |          |      |                                                                                                                                                                                                                                                                                                                                                                                                                                                                                                                                                                                                                                                                                                                                                                                                                                                                                                                                                                            |                      |
|----------|-------------------------------------------------------------------------------------------------------------------------------------------------------------|----------|------|----------------------------------------------------------------------------------------------------------------------------------------------------------------------------------------------------------------------------------------------------------------------------------------------------------------------------------------------------------------------------------------------------------------------------------------------------------------------------------------------------------------------------------------------------------------------------------------------------------------------------------------------------------------------------------------------------------------------------------------------------------------------------------------------------------------------------------------------------------------------------------------------------------------------------------------------------------------------------|----------------------|
| GSE63818 | The Transcriptome and DNA Methylome Landscapes of Human Primordial Germ Cells                                                                               | 26046443 | 2015 | Primordial Germ Cells[female 10 week gestation][13]<br>Primordial Germ Cells[female 11 week gestation][10]<br>Primordial Germ Cells[female 17 week gestation][31]<br>Primordial Germ Cells[female 4 week gestation][12]<br>Primordial Germ Cells[female 8 week gestation][27]<br>Primordial Germ Cells[male 10 week gestation][19]<br>Primordial Germ Cells[male 11 week gestation][27]<br>Primordial Germ Cells[male 19 week gestation][57]<br>Primordial Germ Cells[male 4 week gestation][6]<br>Primordial Germ Cells[male 7 week gestation][40]<br>Somatic Cells[female 10 week gestation][3]<br>Somatic Cells[female 11 week gestation][10]<br>Somatic Cells[female 17 week gestation][9]<br>Somatic Cells[female 4 week gestation][6]<br>Somatic Cells[female 8 week gestation][10]<br>Somatic Cells[male 10 week gestation][11]<br>Somatic Cells[male 11 week gestation][8]<br>Somatic Cells[male 19 week gestation][3]<br>Somatic Cells[male 7 week gestation][26] | GPL11154<br>GPL16791 |
| GSE64016 | Single cell RNA-seq data of human hESCs to evaluate Oscope - a statistical pipeline for identifying oscillatory genes in unsynchronized single cell RNA-Seq | 26301841 | 2015 | single H1 hESC[213]<br>single H1-Fucci cell sorted from G1 phase of the cell cycle only[91]<br>single H1-Fucci cell sorted from G2-M phase of the cell cycle only[76]<br>single H1-Fucci cell sorted from S phase of the cell cycle only[80]                                                                                                                                                                                                                                                                                                                                                                                                                                                                                                                                                                                                                                                                                                                               | GPL16791             |

|          |                                                                                                                                                |          |      |                                                                                                                                                                                  |                                                          |
|----------|------------------------------------------------------------------------------------------------------------------------------------------------|----------|------|----------------------------------------------------------------------------------------------------------------------------------------------------------------------------------|----------------------------------------------------------|
| GSE65364 | Single Cell triple omics sequencing reveals genetic and epigenetic heterogeneity in hepatocellular carcinoma                                   | 26902283 | 2016 | HepG2 cell line[8]<br>liver cancer cell[26]                                                                                                                                      | GPL11154<br>GPL16791<br>GPL17021<br>GPL20795             |
| GSE65481 | Human Embryo Single Cell Transcriptome Analysis                                                                                                | 26904963 | 2015 | zygote (2PN)-bad[11]<br>zygote (2PN)-good[11]                                                                                                                                    | GPL11154                                                 |
| GSE65525 | Droplet barcoding for single cell transcriptomics applied to embryonic stem cells                                                              | 26000487 | 2015 | human K562 cells[239]                                                                                                                                                            | GPL16417<br>GPL16791<br>GPL17021<br>GPL18573<br>GPL19057 |
| GSE66053 | Single mammalian cells compensate for differences in cellular volume and DNA copy number through independent global transcriptional mechanisms | 25866248 | 2015 | primary foreskin fibroblast cell CRL2097 (fixed cell)[14]<br>primary foreskin fibroblast cell CRL2097 (large live)[74]<br>primary foreskin fibroblast cell CRL2097 (med live)[3] | GPL16791<br>GPL18573                                     |
| GSE66357 | Scalable Microfluidics for Single Cell RNA Printing and Sequencing                                                                             | 26047807 | 2015 | MCF10a human breast cancer cells[102]<br>U87 human glioma cells[138]<br>WI-38 human lung fibroblast cells[45]                                                                    | GPL18573                                                 |
| GSE66507 | Single-Cell RNA-seq Defines the Three Cell Lineages of the Human Blastocyst                                                                    | 26293300 | 2015 | Epiblast[8]<br>Primitive Endoderm[6]<br>Trophectoderm[16]                                                                                                                        | GPL11154                                                 |

|          |                                                                                                   |          |      |                                                                                                                                                                                                                                                                                                                                                                                                          |                                  |
|----------|---------------------------------------------------------------------------------------------------|----------|------|----------------------------------------------------------------------------------------------------------------------------------------------------------------------------------------------------------------------------------------------------------------------------------------------------------------------------------------------------------------------------------------------------------|----------------------------------|
| GSE67259 | Robust In Vitro Induction of Human Germ Cell Fate from Pluripotent Stem Cells                     | 26189426 | 2015 | d2 AG+ cells[2]<br>d2 BTAG+ cells[5]<br>d4 AG+ cells[2]<br>d4 BTAG+ cells[5]<br>d6 BTAG+ cells[4]<br>d6 CSM+ cells[2]<br>d8 BTAG+ cells[2]<br>hiPSC[11]<br>iMeLC[4]                                                                                                                                                                                                                                      | GPL15907<br>GPL16288<br>GPL19944 |
| GSE67835 | A survey of human brain transcriptome diversity at the single cell level                          | 26060301 | 2015 | cortex astrocytes[62]<br>cortex endothelial[17]<br>cortex fetal-quiescent[110]<br>cortex fetal-replicating[25]<br>cortex hybrid[44]<br>cortex microglia[8]<br>cortex neurons[130]<br>cortex oligodendrocytes[32]<br>cortex OPC[2]<br>hippocampus endothelial[3]<br>hippocampus hybrid[2]<br>hippocampus microglia[8]<br>hippocampus neurons[1]<br>hippocampus oligodendrocytes[6]<br>hippocampus OPC[16] | GPL15520<br>GPL18573             |
| GSE67980 | RNA-Seq of Single Prostate CTCs Implicates Non-Canonical Wnt Signaling in Antiandrogen Resistance | 26383955 | 2015 | candidate PCa CTC CRPC[33]<br>candidate PCa CTC CSPC[12]<br>lineage-confirmed PCa CTC CRPC enzalutamide-naïve (Group A)[37]<br>lineage-confirmed PCa CTC CRPC progressed on enzalutamide (Group B)[36]<br>lineage-confirmed PCa CTC CSPC enzalutamide-naïve (Group A)[4]<br>PCa cell line[30]<br>white blood cell CRPC[2]<br>white blood cell healthy[3]                                                 | GPL16288                         |
| GSE68596 | Genome-wide maps of nuclear lamina interactions in single human cells (CEL-seq)                   | 26365489 | 2015 | Cell line KBM7, derived from a patient with chronic myeloid leukemia[96]                                                                                                                                                                                                                                                                                                                                 | GPL16791                         |

|          |                                                                                                                                     |          |      |                                                                                                           |          |
|----------|-------------------------------------------------------------------------------------------------------------------------------------|----------|------|-----------------------------------------------------------------------------------------------------------|----------|
| GSE69292 | Integrative analyses of human reprogramming reveal dynamic nature of induced pluripotency [smartseq2]                               | 26186193 | 2015 | hiF-T cell[52]                                                                                            | GPL16791 |
| GSE69405 | Single-cell RNA sequencing of lung adenocarcinoma patient-derived cells                                                             | 26084335 | 2015 | human lung cancer cell line (H358)[50]<br>PDX, LC-MBT-15[49]<br>PDX, LC-PT-45[34]<br>PDX, LC-PT-45-Re[43] | GPL16791 |
| GSE69790 | Single cell transcriptomics analysis of induced pluripotent stem cell-derived cortical neurons reveals frequent dual layer identity | 26740550 | 2016 | iPSC-derived cortical neuron[16]                                                                          | GPL11154 |

|          |                                                                                |          |      |                                                                                                                                                                                                                                                                                                                                                                                                                                                                                                                                                                                                                                         |          |
|----------|--------------------------------------------------------------------------------|----------|------|-----------------------------------------------------------------------------------------------------------------------------------------------------------------------------------------------------------------------------------------------------------------------------------------------------------------------------------------------------------------------------------------------------------------------------------------------------------------------------------------------------------------------------------------------------------------------------------------------------------------------------------------|----------|
| GSE70580 | Single cell RNA-sequencing of human tonsil Innate lymphoid cells (ILCs)        | 26878113 | 2016 | Donor T74-tonsil innate lymphoid cell (ILC1)[1]<br>Donor T74-tonsil innate lymphoid cell (ILC2)[11]<br>Donor T74-tonsil innate lymphoid cell (ILC3)[38]<br>Donor T74-tonsil innate lymphoid cell (NK)[25]<br>Donor T75-tonsil innate lymphoid cell (ILC1)[60]<br>Donor T75-tonsil innate lymphoid cell (ILC2)[62]<br>Donor T75-tonsil innate lymphoid cell (ILC3)[128]<br>Donor T75-tonsil innate lymphoid cell (NK)[23]<br>Donor T86-tonsil innate lymphoid cell (ILC1)[66]<br>Donor T86-tonsil innate lymphoid cell (ILC2)[66]<br>Donor T86-tonsil innate lymphoid cell (ILC3)[142]<br>Donor T86-tonsil innate lymphoid cell (NK)[26] | GPL11154 |
| GSE71315 | Single cell analysis of long non-coding RNAs in the developing human neocortex | 27081004 | 2016 | Cerebral Cortex GW19.5[26]<br>Cerebral Cortex GW20.5[123]<br>Cerebral Cortex GW23.5[77]                                                                                                                                                                                                                                                                                                                                                                                                                                                                                                                                                 | GPL16791 |
| GSE71318 | Tracing the expression of circular RNAs in human preimplantation embryos       | NA       | 2016 | human 2 cell[4]<br>human 4 cell[4]<br>human 8 cell[5]<br>human early blastocyst[3]<br>human ICM[3]<br>human late blastocyst[3]<br>human middle blastocyst[3]<br>human MII oocyte[4]<br>human morula[4]<br>human stem cells[7]<br>human TE[3]<br>human zygote[5]                                                                                                                                                                                                                                                                                                                                                                         | GPL16791 |



|          |                                                                                                         |          |      |                                                                                                                                                                                                                                                                                                    |          |
|----------|---------------------------------------------------------------------------------------------------------|----------|------|----------------------------------------------------------------------------------------------------------------------------------------------------------------------------------------------------------------------------------------------------------------------------------------------------|----------|
| GSE71858 | Fixed single-cell transcriptomic characterization of human radial glial diversity                       | 26524239 | 2015 | cultured embryonic stem cells (H1) DAPI-Live cells FRSCR[15]<br>cultured embryonic stem cells (H1) DAPI-Live cells Triton X Lysis[11]<br>cultured embryonic stem cells (H1) DAPI+ Fixed cells FRSCR[12]<br>cultured embryonic stem cells (H1) DAPI+ Fixed cells Triton X Lysis[7]                  | GPL16791 |
| GSE72056 | Single cell RNA-seq analysis of melanoma                                                                | 27124452 | 2016 | B-cell[326]<br>CAF[39]<br>Endothelial cell[40]<br>Macrophage[42]<br>melanoma[1071]<br>melanoma tumor[246]<br>T-cell[1302]<br>unresolved[96]                                                                                                                                                        | GPL18573 |
| GSE73121 | Single-cell transcriptome profiling for metastatic renal cell carcinoma patient-derived cells [RNA-seq] | 27139883 | 2015 | metastatic renal cell carcinoma[35]<br>PDX metastatic renal cell carcinoma[36]<br>PDX primary renal cell carcinoma[47]                                                                                                                                                                             | GPL16791 |
| GSE73727 | Single-cell transcriptomics reveals unique features of human pancreatic islet cell subtypes             | 26691212 | 2016 | pancreatic islet[4]<br>pancreatic islet acinar[11]<br>pancreatic islet alpha[18]<br>pancreatic islet beta[12]<br>pancreatic islet delta[2]<br>pancreatic islet duct[8]<br>pancreatic islet pp[9]                                                                                                   | GPL11154 |
| GSE75140 | Human cerebral organoids recapitulate gene expression programs of fetal neocortex development.          | 26644564 | 2015 | ESC H9[53 days][96]<br>fetal human cortex 1[12 weeks post-conception][164]<br>fetal human cortex 2[13 weeks post-conception][62]<br>iPSC 409B2[33 days][40]<br>iPSC 409B2[35 days][68]<br>iPSC 409B2[37 days][71]<br>iPSC 409B2[41 days][74]<br>iPSC 409B2[58 days][79]<br>iPSC 409B2[65 days][80] | GPL16791 |

|          |                                                                                                                                            |          |      |                             |          |
|----------|--------------------------------------------------------------------------------------------------------------------------------------------|----------|------|-----------------------------|----------|
| GSE77564 | Coupled electrophysiological recording and single-cell transcriptome analyses revealed molecular mechanisms underlying neuronal maturation | 26883038 | 2016 | hES hiPS-derived neuron[20] | GPL16791 |
|----------|--------------------------------------------------------------------------------------------------------------------------------------------|----------|------|-----------------------------|----------|

Table S3. Summary of cell lines or types in scRNASeqDB

| Category            | Cell line or cell type             |
|---------------------|------------------------------------|
| Reproduction relate | blastomere                         |
|                     | zygote                             |
|                     | oocyte                             |
|                     | morula                             |
|                     | trophectoderm                      |
|                     | somatic cells from gestation       |
|                     | pronucleus                         |
|                     | primordial germ cell (PGC)         |
| Immune related      | T-cell                             |
|                     | B-cell                             |
|                     | white blood cell (WBC)             |
|                     | B lymphocyte cell line (DG-75)     |
|                     | tonsil innate lymphoid cell (ILC)  |
|                     | tonsil innate lymphoid cell (NK)   |
|                     | lymphoblastoid cell line (GM12878) |
|                     | hiF-T cell                         |
|                     | macrophage                         |
| Cancer related      | HepG2 cell line                    |
|                     | liver cancer cell                  |
|                     | breast cancer cell line (SKBR3)    |
|                     | breast cancer cell line (MCF10a)   |
|                     | human melanoma cell line (UACC257) |
|                     | primary melanocyte                 |
|                     | melanoma cell line (SK-MEL-5 )     |
|                     | melanoma cell                      |
|                     | human glioma cell line (U87)       |
|                     | glioblastoma cell                  |
|                     | metastatic renal cell carcinoma    |

|                              |                                                                      |
|------------------------------|----------------------------------------------------------------------|
|                              | PDX metastatic renal cell carcinoma                                  |
|                              | PDX primary renal cell carcinoma                                     |
|                              | human lung cancer cell line (H358)                                   |
|                              | PDX, lung cancer                                                     |
|                              | human lung normal fibroblast cell line (WI-38)                       |
|                              | cancer associated fibroblasts (CAFs)                                 |
|                              | cell line KBM7, derived from a patient with chronic myeloid leukemia |
|                              | urinary bladder transitional cell carcinoma cell line (T24)          |
|                              | prostate carcinoma cell line (LNCaP)                                 |
|                              | PC3 cell line                                                        |
|                              | prostate cell line                                                   |
|                              | prostate circulating tumor cell                                      |
|                              | pancreas circulating tumor cell                                      |
|                              | pancreatic islet                                                     |
|                              | colon carcinoma cell line (HCT116)                                   |
| The brain and nervous system | cerebral cortex                                                      |
|                              | cortex astrocytes                                                    |
|                              | cortex endothelial                                                   |
|                              | cortex fetal-quiescent                                               |
|                              | cortex fetal-replicating                                             |
|                              | cortex hybrid                                                        |
|                              | cortex neurons                                                       |
|                              | cortex oligodendrocytes                                              |
|                              | cortex OPC                                                           |
|                              | fetal human cortex                                                   |
|                              | hES hiPS-derived neuron                                              |
|                              | iPSC-derived cortical neuron                                         |
|                              | hippocampus endothelial                                              |
|                              | hippocampus hybrid                                                   |
|                              | hippocampus microglia                                                |
|                              | hippocampus neurons                                                  |
|                              | hippocampus oligodendrocytes                                         |
|                              | hippocampus OPC                                                      |
| Stem cell related            | human K562 cells                                                     |
|                              | human embryonic stem cell (hESC)                                     |
|                              | human induced pluripotent stem cell (hiPSC)                          |
|                              | iPSC cell line 409B2                                                 |
| Others                       | endothelial cell                                                     |
|                              | epiblast cell                                                        |
|                              | HEK293T                                                              |
|                              | primitive endoderm                                                   |

|  |                                            |
|--|--------------------------------------------|
|  | primary foreskin fibroblast cell (CRL2097) |
|  | human skeletal muscle myoblasts (HSMM)     |
